# Supplementary material for: Fire air pollution reduces global terrestrial productivity
Source: PubMed Central journal article supplement (PMC6303378; doi:10.1038/s41467-018-07921-4), 2018-12-21
Supplement: 41467_2018_7921_MOESM1_ESM.pdf [file 41467_2018_7921_MOESM1_ESM.pdf]

## **Supplementary Information**

### **Fire air pollution reduces global terrestrial productivity**

Xu Yue and Nadine Unger

**Supplementary Table 1 | Summary of simulations for fire pollution effects**

| <b>Simulations</b> | <b>Model</b> | <b>Input</b>                                        | <b>O<sub>3</sub> effect <sup>a</sup></b> | <b>Output</b>                                |
|--------------------|--------------|-----------------------------------------------------|------------------------------------------|----------------------------------------------|
| GC_NOFIRE          | GEOS-Chem    | All emissions without fires                         | N/A                                      | Monthly aerosol and hourly [O <sub>3</sub> ] |
| GC_FIRE            | GEOS-Chem    | All emissions with fires                            | N/A                                      | Monthly aerosol and hourly [O <sub>3</sub> ] |
| CRM_NA             | CRM          | No aerosols                                         | N/A                                      | Hourly direct and diffuse PAR                |
| CRM_AA             | CRM          | Aerosols from GC_NOFIRE                             | N/A                                      | Hourly direct and diffuse PAR                |
| CRM_FA             | CRM          | Aerosols from GC_FIRE                               | N/A                                      | Hourly direct and diffuse PAR                |
| YIBS_NA            | YIBs         | PAR from CRM_NA                                     | None                                     | Monthly GPP                                  |
| YIBS_AA            | YIBs         | PAR from CRM_AA                                     | None                                     | Monthly GPP                                  |
| YIBS_FA            | YIBs         | PAR from CRM_FA                                     | None                                     | Monthly GPP                                  |
| YIBS_NOH           | YIBs         | PAR from CRM_NA<br>[O <sub>3</sub> ] from GC_NOFIRE | High                                     | Monthly GPP                                  |
| YIBS_NOL           | YIBs         | PAR from CRM_NA<br>[O <sub>3</sub> ] from GC_NOFIRE | Low                                      | Monthly GPP                                  |
| YIBS_FOH           | YIBs         | PAR from CRM_NA<br>[O <sub>3</sub> ] from GC_FIRE   | High                                     | Monthly GPP                                  |
| YIBS_FOL           | YIBs         | PAR from CRM_NA<br>[O <sub>3</sub> ] from GC_FIRE   | Low                                      | Monthly GPP                                  |
| YIBS_AAOH          | YIBs         | PAR from CRM_AA<br>[O <sub>3</sub> ] from GC_NOFIRE | High                                     | Monthly GPP                                  |
| YIBS_AAOL          | YIBs         | PAR from CRM_AA<br>[O <sub>3</sub> ] from GC_NOFIRE | Low                                      | Monthly GPP                                  |
| YIBS_FAOH          | YIBs         | PAR from CRM_FA<br>[O <sub>3</sub> ] from GC_FIRE   | High                                     | Monthly GPP                                  |
| YIBS_FAOL          | YIBs         | PAR from CRM_FA<br>[O <sub>3</sub> ] from GC_FIRE   | Low                                      | Monthly GPP                                  |

<sup>a</sup> Ozone damage applied in the simulation can be low or high for the same level of [O<sub>3</sub>], depending on the selection of damaging coefficients <sup>1</sup>.

**Supplementary Table 2 | Sensitivity experiments for O<sub>3</sub> damaging scheme with YIBs model**

| <b>ID</b> | <b>Simulations <sup>a</sup></b> | <b>[O<sub>3</sub>] (ppbv)</b> | <b>O<sub>3</sub> effect</b> | <b>GPP (Pg)</b> | <b>ΔGPP (%) <sup>b</sup></b> |
|-----------|---------------------------------|-------------------------------|-----------------------------|-----------------|------------------------------|
| 1         | YIBS_O000                       | 0                             | Null                        | 138.4           | 0                            |
| 2         | YIBS_O020L                      | 20                            | Low                         | 137.3           | -0.8                         |
| 3         | YIBS_O040L                      | 40                            | Low                         | 132.2           | -4.5                         |
| 4         | YIBS_O060L                      | 60                            | Low                         | 125.6           | -9.3                         |
| 5         | YIBS_O080L                      | 80                            | Low                         | 119.4           | -13.8                        |
| 6         | YIBS_O100L                      | 100                           | Low                         | 113.8           | -17.8                        |
| 7         | YIBS_O120L                      | 120                           | Low                         | 108.9           | -21.3                        |
| 8         | YIBS_O140L                      | 140                           | Low                         | 104.5           | -24.5                        |
| 9         | YIBS_O160L                      | 160                           | Low                         | 100.6           | -27.4                        |
| 10        | YIBS_O020H                      | 20                            | High                        | 135.1           | -2.4                         |
| 11        | YIBS_O040H                      | 40                            | High                        | 123.4           | -10.9                        |
| 12        | YIBS_O060H                      | 60                            | High                        | 111.3           | -19.6                        |
| 13        | YIBS_O080H                      | 80                            | High                        | 101.4           | -26.8                        |
| 14        | YIBS_O100H                      | 100                           | High                        | 93.3            | -32.6                        |
| 15        | YIBS_O120H                      | 120                           | High                        | 86.6            | -37.4                        |
| 16        | YIBS_O140H                      | 140                           | High                        | 81.0            | -41.5                        |
| 17        | YIBS_O160H                      | 160                           | High                        | 76.2            | -44.9                        |

<sup>a</sup> Each simulation is performed for 2007-2011 using the same meteorology. The last 3 years are used to calculate the O<sub>3</sub>-induced damages to GPP as shown in Fig. 1.

<sup>b</sup> Compared with GPP in simulation YIBS\_O000.

**Supplementary Table 3 | Sensitivity experiments for fire ozone effects with YIBs model**

| <b>Simulations <sup>a</sup></b> | <b>Ozone input</b> | <b>O<sub>3</sub> effect <sup>b</sup></b> | <b>GPP (Pg C yr<sup>-1</sup>)</b> |
|---------------------------------|--------------------|------------------------------------------|-----------------------------------|
| YIBS_NOH_LE                     | GC_NOFIRE          | High                                     | 130.3                             |
| YIBS_NOL_LE                     | GC_NOFIRE          | Low                                      | 133.5                             |
| YIBS_FOH_LE                     | GC_FIRE            | High                                     | 129.2                             |
| YIBS_FOL_LE                     | GC_FIRE            | Low                                      | 133.0                             |

<sup>a</sup> Each simulation is performed for 2001-2011.

<sup>b</sup> Ozone damaging coefficients of evergreen broadleaf forest (EBF) are lower by 1/3 for both high and low sensitivities.

**Supplementary Table 4 | Sensitivity experiments for cloud diffuse effects on GPP using CRM model**

| <b>ID</b> | <b>Simulations <sup>a</sup></b> | <b>Cloud scale <sup>b</sup></b> | <b>Total PAR<br/>(W m<sup>-2</sup>)</b> | <b>Diffuse fraction</b> |
|-----------|---------------------------------|---------------------------------|-----------------------------------------|-------------------------|
| 1         | CRM_C000                        | 0                               | 128.1                                   | 0.10                    |
| 2         | CRM_C001                        | 0.1                             | 127.9                                   | 0.10                    |
| 3         | CRM_C002                        | 0.2                             | 127.1                                   | 0.12                    |
| 4         | CRM_C003                        | 0.3                             | 125.6                                   | 0.15                    |
| 5         | CRM_C004                        | 0.4                             | 123.5                                   | 0.19                    |
| 6         | CRM_C005                        | 0.5                             | 120.9                                   | 0.23                    |
| 7         | CRM_C006                        | 0.6                             | 117.9                                   | 0.27                    |
| 8         | CRM_C007                        | 0.7                             | 114.7                                   | 0.31                    |
| 9         | CRM_C008                        | 0.8                             | 111.3                                   | 0.35                    |
| 10        | CRM_C009                        | 0.9                             | 107.8                                   | 0.38                    |
| 11        | CRM_C010                        | 1.0                             | 104.3                                   | 0.41                    |
| 12        | CRM_C012                        | 1.2                             | 98.4                                    | 0.45                    |
| 13        | CRM_C014                        | 1.4                             | 93.0                                    | 0.48                    |
| 14        | CRM_C017                        | 1.7                             | 86.1                                    | 0.51                    |
| 15        | CRM_C020                        | 2.0                             | 80.3                                    | 0.52                    |
| 16        | CRM_C030                        | 3.0                             | 66.6                                    | 0.54                    |
| 17        | CRM_C040                        | 4.0                             | 58.1                                    | 0.54                    |
| 18        | CRM_C050                        | 5.0                             | 52.3                                    | 0.53                    |
| 19        | CRM_C070                        | 7.0                             | 44.9                                    | 0.50                    |
| 20        | CRM_C100                        | 10.0                            | 38.6                                    | 0.46                    |

<sup>a</sup> Each simulation is performed for 2007-2011 without aerosol radiative effects. The CRM model output of hourly diffuse and direct PAR radiation is used as input for YIBs model.

<sup>b</sup> Observed 3-D cloud fraction and liquid water path are multiplied by corresponding scaling factors.

**Supplementary Table 5 | Sensitivity experiments for cloud diffuse effects on GPP using YIBs model**

| <b>ID</b> | <b>Simulations <sup>a</sup></b> | <b>PAR input</b> | <b>GPP (Pg)</b> | <b><math>\Delta</math>GPP (%) <sup>b</sup></b> |
|-----------|---------------------------------|------------------|-----------------|------------------------------------------------|
| 1         | YIBS_C000                       | CRM_C000         | 106.3           | 0                                              |
| 2         | YIBS_C001                       | CRM_C001         | 107.1           | 0.8                                            |
| 3         | YIBS_C002                       | CRM_C002         | 110.5           | 3.9                                            |
| 4         | YIBS_C003                       | CRM_C003         | 115.9           | 9.1                                            |
| 5         | YIBS_C004                       | CRM_C004         | 122.3           | 15.0                                           |
| 6         | YIBS_C005                       | CRM_C005         | 128.3           | 20.7                                           |
| 7         | YIBS_C006                       | CRM_C006         | 133.3           | 25.4                                           |
| 8         | YIBS_C007                       | CRM_C007         | 136.8           | 28.7                                           |
| 9         | YIBS_C008                       | CRM_C008         | 138.7           | 30.5                                           |
| 10        | YIBS_C009                       | CRM_C009         | 139.2           | 31.0                                           |
| 11        | YIBS_C010                       | CRM_C010         | 138.4           | 30.2                                           |
| 12        | YIBS_C012                       | CRM_C012         | 135.0           | 27.0                                           |
| 13        | YIBS_C014                       | CRM_C014         | 129.8           | 22.1                                           |
| 14        | YIBS_C017                       | CRM_C017         | 120.9           | 13.8                                           |
| 15        | YIBS_C020                       | CRM_C020         | 112.0           | 5.4                                            |
| 16        | YIBS_C030                       | CRM_C030         | 87.1            | -18.1                                          |
| 17        | YIBS_C040                       | CRM_C040         | 69.8            | -34.3                                          |
| 18        | YIBS_C050                       | CRM_C050         | 57.9            | -45.6                                          |
| 19        | YIBS_C070                       | CRM_C070         | 43.3            | -59.3                                          |
| 20        | YIBS_C100                       | CRM_C100         | 32.1            | -69.8                                          |

<sup>a</sup> Each simulation is performed for 2007-2011 using hourly diffuse and direct PAR from the corresponding CRM simulation in Supplementary Table 4.

<sup>b</sup> Compared with GPP in simulation YIBS\_C000.

**Supplementary Table 6 | Sensitivity experiments for fire aerosol effects with CRM model**

| <b>Simulations <sup>a</sup></b> | <b>Aerosols</b>                    | <b>Cloud <sup>b</sup></b>               | <b>Total PAR (W m<sup>-2</sup>)</b> | <b>Diffuse fraction</b> |
|---------------------------------|------------------------------------|-----------------------------------------|-------------------------------------|-------------------------|
| CRM_AA_C00                      | GC_NOFIRE                          | Cloud fraction and LWP set to zero      | 123.6                               | 0.164                   |
| CRM_AA_C05                      | GC_NOFIRE                          | Cloud fraction and LWP reduce by 50%    | 117.0                               | 0.282                   |
| CRM_AA_C20                      | GC_NOFIRE                          | Cloud fraction and LWP increase by 100% | 77.9                                | 0.559                   |
| CRM_AA_C3H                      | GC_NOFIRE                          | 3-hourly cloud variables are applied    | 92.0                                | 0.468                   |
| CRM_FA_C00                      | GC_FIRE                            | Cloud fraction and LWP set to zero      | 123.2                               | 0.169                   |
| CRM_FA_C05                      | GC_FIRE                            | Cloud fraction and LWP reduce by 50%    | 116.6                               | 0.286                   |
| CRM_FA_C20                      | GC_FIRE                            | Cloud fraction and LWP increase by 100% | 77.6                                | 0.562                   |
| CRM_FA_C3H                      | GC_FIRE                            | 3-hourly cloud variables are applied    | 91.7                                | 0.471                   |
| CRM_FA_BC05                     | Fire BC reduces by 50%             | Observed cloud fraction and LWP         | 100.9                               | 0.455                   |
| CRM_FA_BC20                     | Fire BC increases by 100%          | Observed cloud fraction and LWP         | 100.7                               | 0.455                   |
| CRM_FA2                         | All fire aerosols increase by 100% | Observed cloud fraction and LWP         | 100.5                               | 0.458                   |
| CRM_FA3                         | All fire aerosols increase by 200% | Observed cloud fraction and LWP         | 100.2                               | 0.461                   |

<sup>a</sup> Each simulation is performed for 2001-2011. The model output of hourly diffuse and direct PAR radiation is used as input for YIBs model.

<sup>b</sup> Cloud fraction and liquid water path (LWP) change at the same rate.

**Supplementary Table 7 | Sensitivity experiments for fire aerosol effects with YIBs model**

| <b>Simulations <sup>a</sup></b> | <b>PAR input</b> | <b>GPP (Pg C yr<sup>-1</sup>)</b> |
|---------------------------------|------------------|-----------------------------------|
| YIBS_AA_C00                     | CRM_AA_C00       | 112.2                             |
| YIBS_AA_C05                     | CRM_AA_C05       | 129.8                             |
| YIBS_AA_C20                     | CRM_AA_C20       | 109.9                             |
| YIBS_AA_C3H                     | CRM_AA_C3H       | 125.4                             |
| YIBS_FA_C00                     | CRM_FA_C00       | 112.9                             |
| YIBS_FA_C05                     | CRM_FA_C05       | 130.2                             |
| YIBS_FA_C20                     | CRM_FA_C20       | 109.7                             |
| YIBS_FA_C3H                     | CRM_FA_C3H       | 125.4                             |
| YIBS_FA_BC05                    | CRM_FA_BC05      | 136.8                             |
| YIBS_FA_BC20                    | CRM_FA_BC20      | 136.6                             |
| YIBS_FA2                        | CRM_FA2          | 136.7                             |
| YIBS_FA3                        | CRM_FA3          | 136.7                             |

<sup>a</sup> Each simulation is performed for 2001-2011 using hourly diffuse and direct PAR from the corresponding CRM simulation in Supplementary Table 6. Ozone damaging effects are turned off.



**Supplementary Table 8 | Sensitivity experiments for evaluation of modeling uncertainties**

| <b>Runs</b> | <b>Descriptions</b>                                                    | <b>Changes in GPP</b>     |
|-------------|------------------------------------------------------------------------|---------------------------|
| O3_L        | O3 damaging with low sensitivity                                       | YIBS_FOL – YIBS_NOL       |
| O3_H        | O3 damaging with high sensitivity                                      | YIBS_FOH – YIBS_NOH       |
| LE_L        | O3 damaging with low sensitivity<br>coefficient of EBF reduces by 1/3  | YIBS_FOL_LE – YIBS_NOL_LE |
| LE_H        | O3 damaging with high sensitivity<br>coefficient of EBF reduces by 1/3 | YIBS_FOH_LE – YIBS_NOH_LE |
| CLD05       | Observed cloud fraction is scaled by 0.5                               | YIBS_FA_C05 – YIBS_AA_C05 |
| CLD10       | Observed daily cloud fraction                                          | YIBS_FA – YIBS_AA         |
| CLD3H       | Observed 3-hour cloud fraction                                         | YIBS_FA_C3H – YIBS_AA_C3H |
| CLD20       | Observed cloud fraction is scaled by 2                                 | YIBS_FA_C20 – YIBS_AA_C20 |
| BC05        | BC content reduces by 50%<br>OC content increases by 5%                | YIBS_FA_BC05 – YIBS_AA    |
| BC20        | BC content increases by 100%<br>OC content reduces by 10%              | YIBS_FA_BC20 – YIBS_AA    |
| FA2         | Fire aerosol concentrations are doubled                                | YIBS_FA2 – YIBS_AA        |
| FA3         | Fire aerosol concentrations are tripled                                | YIBS_FA3 – YIBS_AA        |

### FLUXNET sites

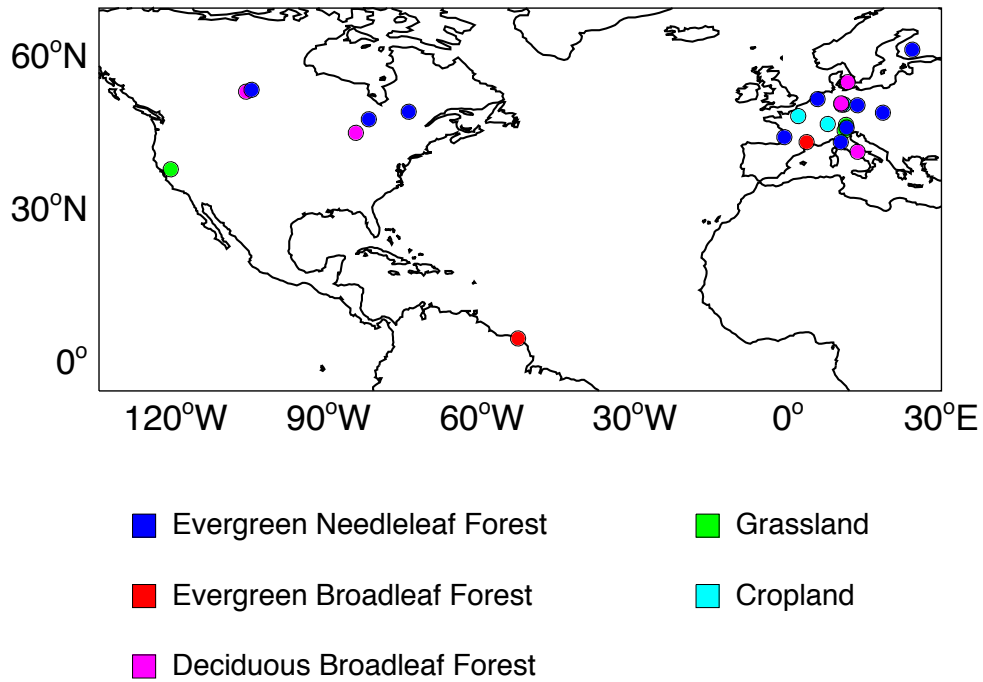

**Supplementary Figure 1 | Distribution of 24 FLUXNET sites with diffuse radiation.** Sites are selected with at least 5-year measurements. The color indicates different land types as evergreen needleleaf forest (ENF, blue), evergreen broadleaf forest (EBF, red), deciduous broadleaf forest (DBF, magenta), grasslands (GRA, green), and croplands (CRO, cyan). These sites provide half-hourly observations of diffuse radiation.

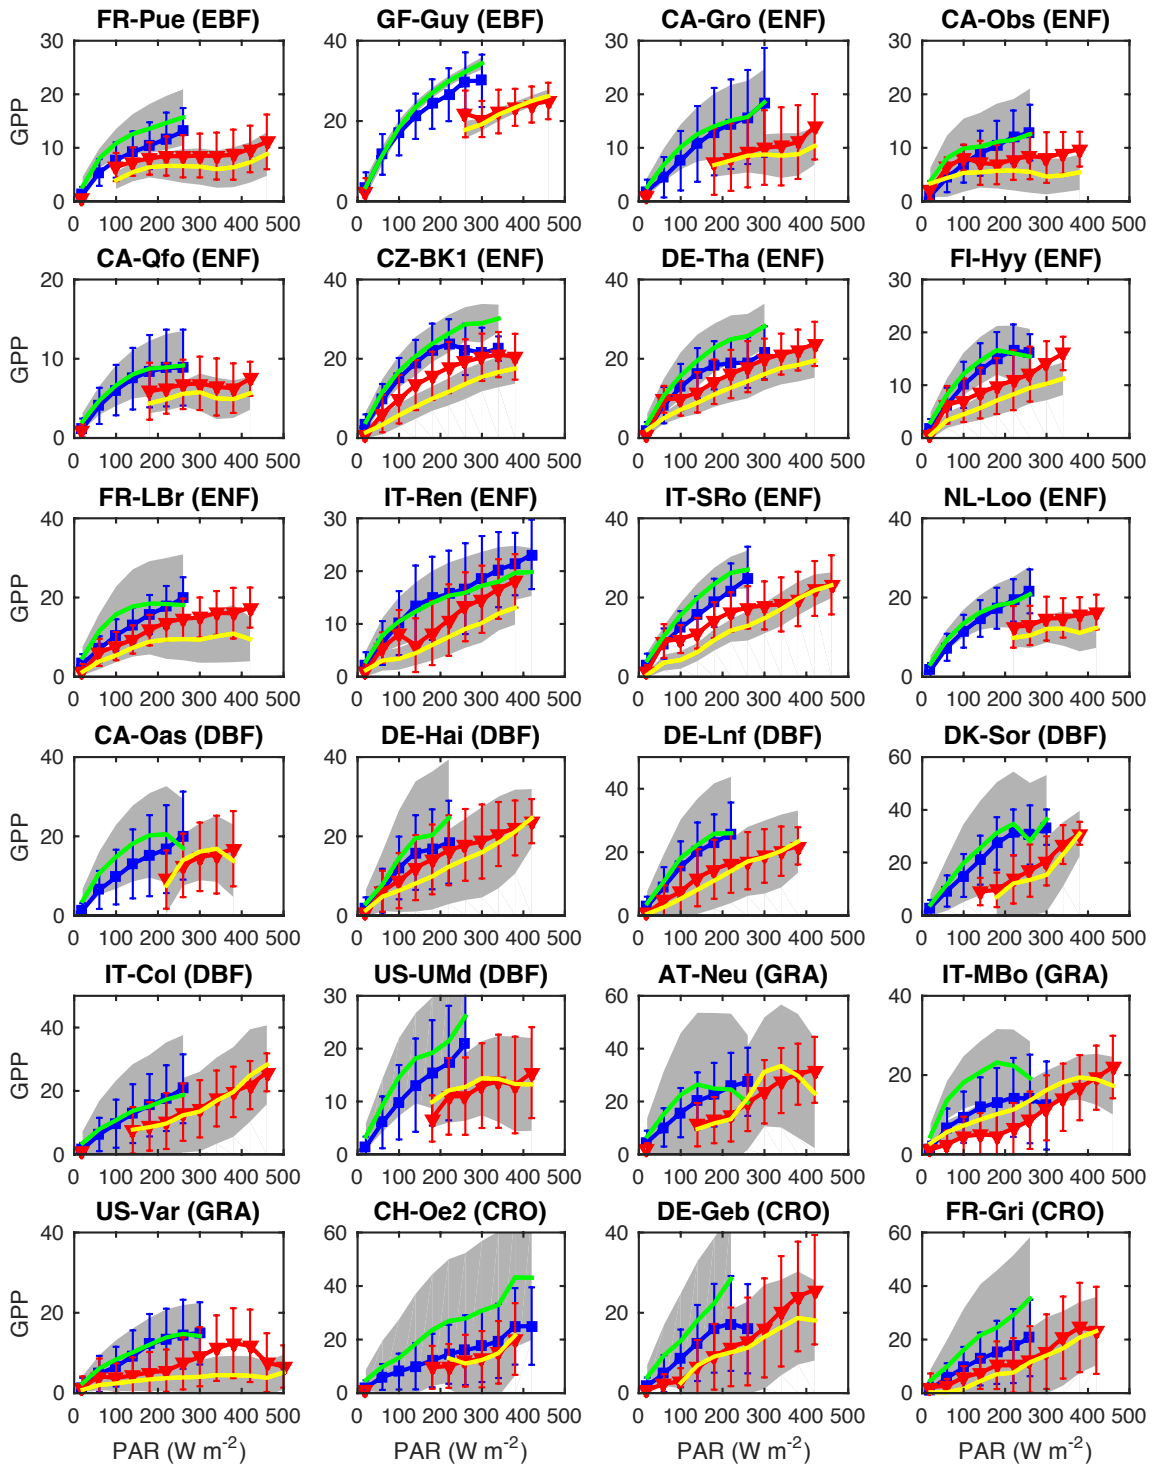

**Supplementary Figure 2 | Evaluation of simulated GPP responses to direct and diffuse radiation.** The comparisons are performed at 24 FLUXNET sites. For each site, observations are split into ‘diffuse’ and ‘direct’ conditions if the diffuse fraction is  $>0.8$  (blue squares) and  $<0.2$  (red triangles), respectively. The categorized observations are then averaged over PAR bins of  $40 \text{ W m}^{-2}$  with error bars indicating one standard deviation of GPP for each bin. Similarly, simulations are split into ‘diffuse’ (green) and ‘direct’ (yellow) bins of PAR and GPP is calculated for each bin with gray shading indicating one standard deviation. The name of site and the specific vegetation type is listed on the title of each panel.

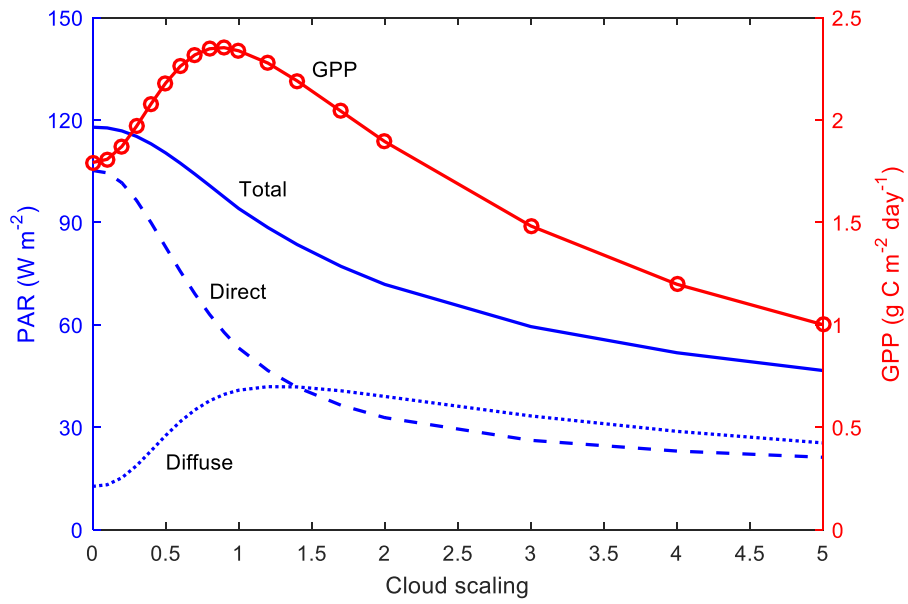

**Supplementary Figure 3 | Responses of global GPP to varied cloud scalings.** Results shown are global GPP (red) and PAR radiation (blue) for different simulations with varied cloud scaling factor (Supplementary Table 4).

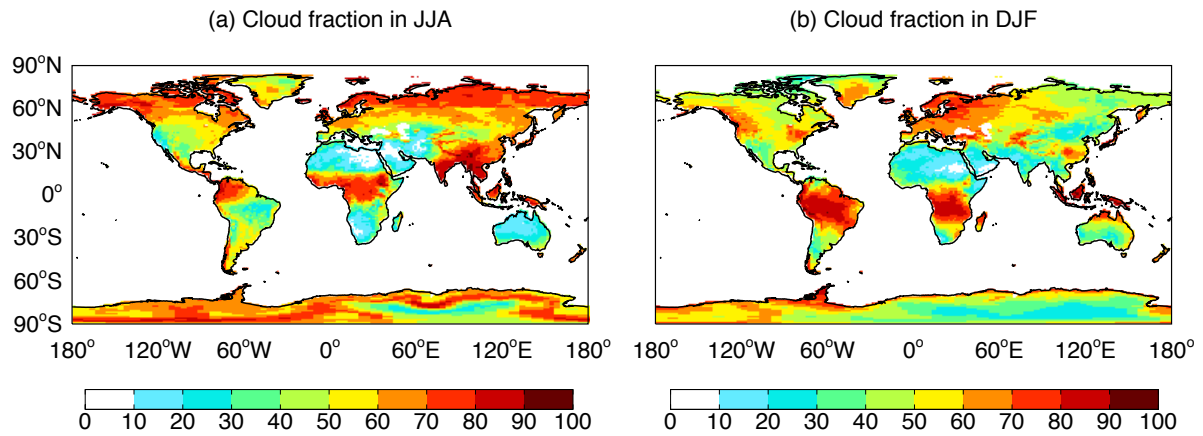

**Supplementary Figure 4 | Seasonality of global cloud amount.** Results shown are cloud fraction (%) in (a) June-July-August and (b) December-January-February from the SYN1deg product of NASA Clouds and the Earth's Radiant Energy System (CERES)<sup>2</sup>.

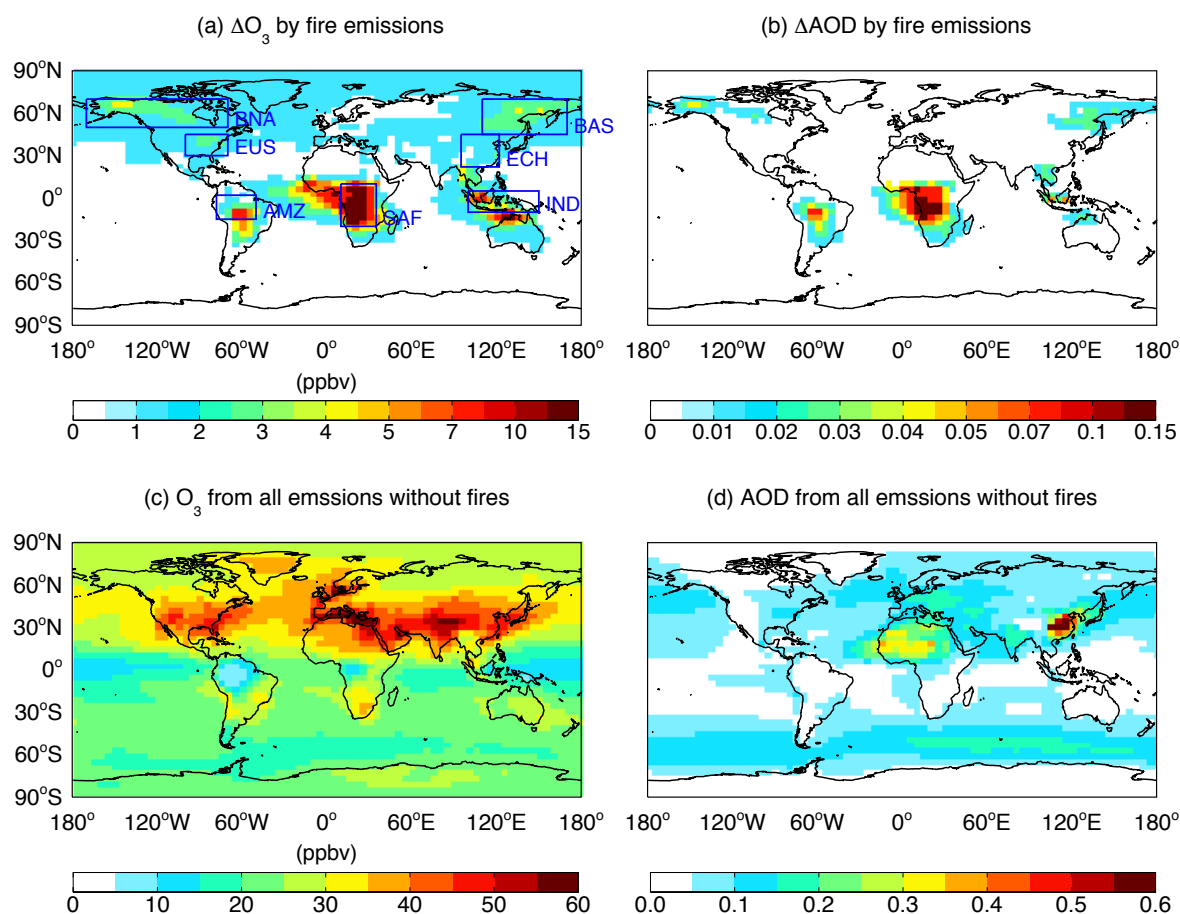

**Supplementary Figure 5 | Ozone and aerosol optical depth (AOD) from fire and non-fire sources.** Results shown are the annual mean (a, c) surface  $O_3$  concentration and (b, d) AOD at 550 nm caused by (a, b) fire emissions alone (GC\_FIRE – GC\_NOFIRE) and (c, d) non-fire sources (GC\_NOFIRE). For (a) and (b), only significant ( $p < 0.1$ ) changes are shown. The color scales are different between the top and bottom panels. Seven regions in Figure (a) are Amazon (AMZ), southern Africa (SAF), Indonesia (IND), eastern U.S. (EUS), eastern China (ECH), boreal North America (BNA), and boreal Asia (BAS).

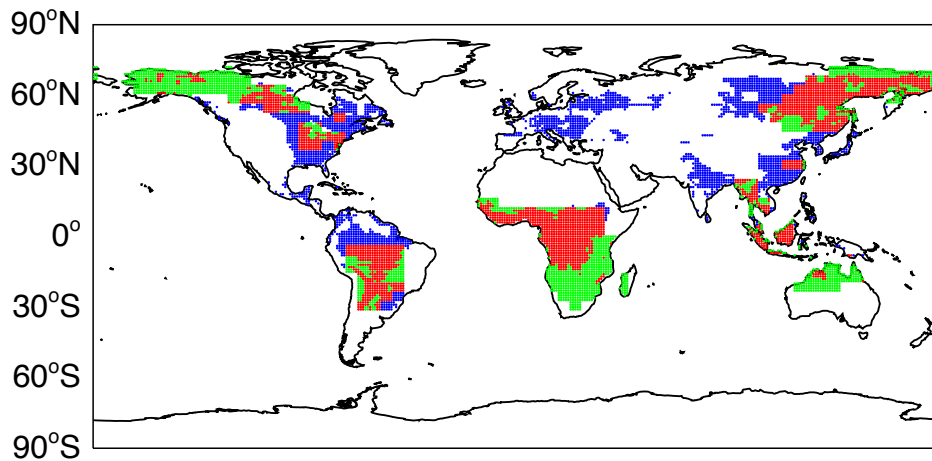

**Supplementary Figure 6 | Changes in GPP caused by fire O<sub>3</sub> from different sources.** For each land grid, fire O<sub>3</sub>-induced changes in GPP ( $\Delta$ GPP) and fire O<sub>3</sub> concentrations ( $[O_3]$ ) are derived and sorted, respectively. Grids with both high  $\Delta$ GPP (>80<sup>th</sup> percentile) and high fire  $[O_3]$  (>80<sup>th</sup> percentile) are marked with red. Grids with high  $\Delta$ GPP (>80<sup>th</sup> percentile) without high fire  $[O_3]$  (<80<sup>th</sup> percentile) are marked with blue. Grids with high fire  $[O_3]$  (>80<sup>th</sup> percentile) but relatively small  $\Delta$ GPP (<80<sup>th</sup> percentile) are marked with green. For red patches, fire  $[O_3]$  is high and the resultant  $\Delta$ GPP is large. For blue patches, low to medium fire  $[O_3]$  results in large  $\Delta$ GPP. For green patches, high fire  $[O_3]$  results in small  $\Delta$ GPP.

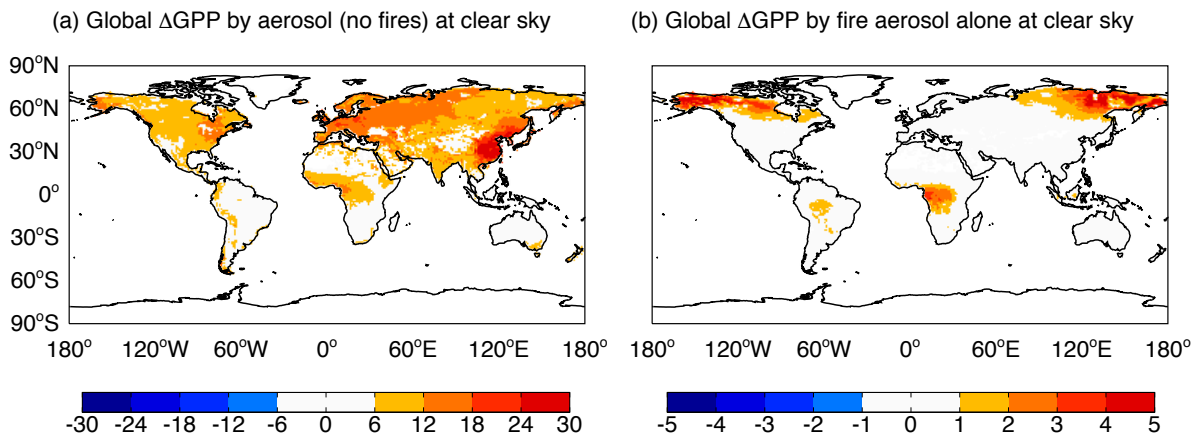

**Supplementary Figure 7 | Percentage change in GPP caused by aerosol diffuse fertilization effect at clear sky.** The effects of aerosol from all sources (anthropogenic + natural) except fire emissions are shown in the left, and those from fire emissions alone are in the right. Units: %.



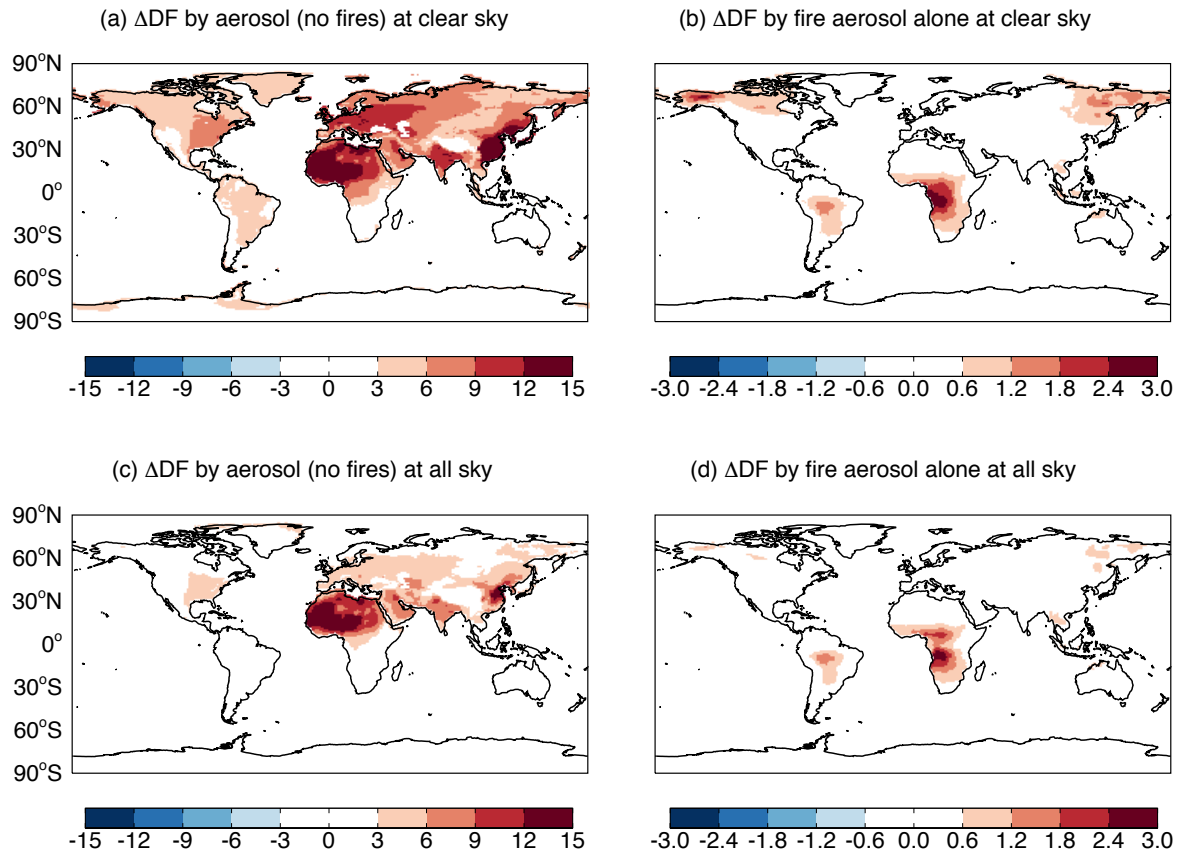

**Supplementary Figure 8 | Changes in diffuse fraction caused by aerosols.** Results shown are the changes in diffuse fraction (diffuse/total) due to (a, c) all aerosols without fire emissions and (b, d) fire aerosols alone at the (a, b) clear-sky and (c, d) all-sky conditions. Units: %.

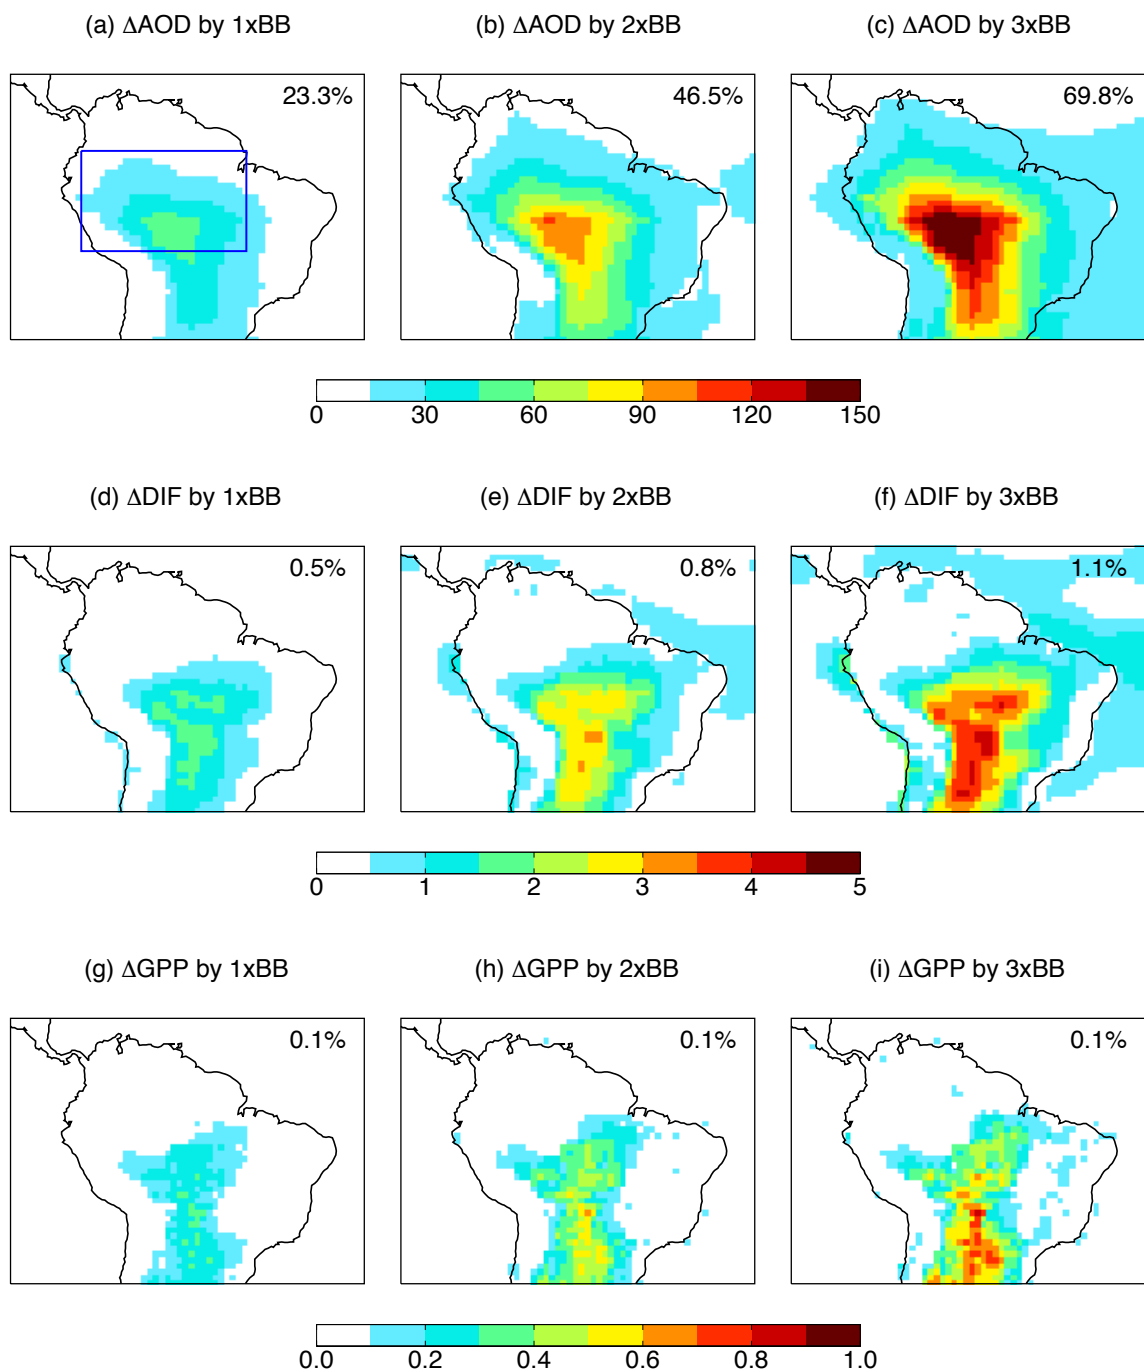

**Supplementary Figure 9 | Predicted changes in diffuse fraction and GPP due to enhanced fire aerosols.** Results shown are percentage changes in (a, b, c) AOD, (d, e, f) diffuse radiation, and (g, h, i) GPP over Amazon region due to (a, d, g) current, (b, e, h) double, and (c, f, i) triple fire aerosols.

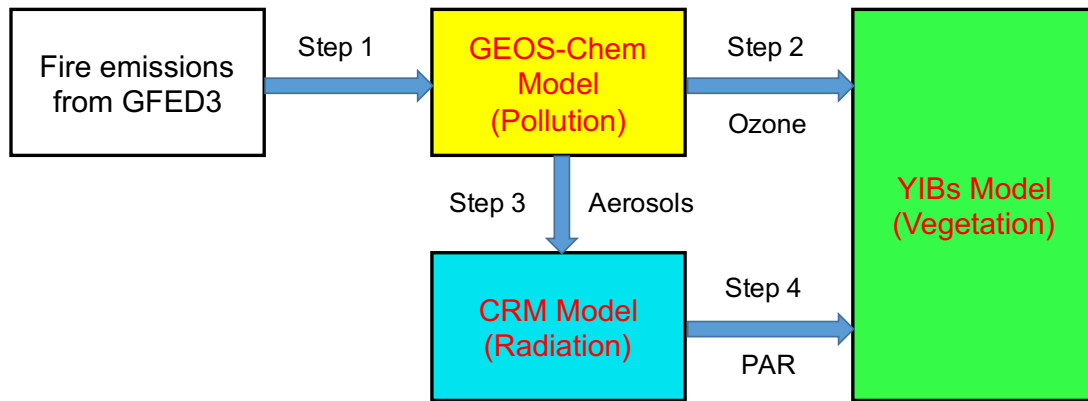

**Supplementary Figure 10 | Models and simulations used for this study.** Step 1: Simulate fire-induced aerosols and ozone using GEOS-Chem Model for 2001-2011. Step 2: Simulate ozone damaging to GPP using YIBs model. Step 3: Simulate aerosol-induced PAR radiation change using CRM model. Step 4: Simulate GPP responses to PAR change using YIBs model.

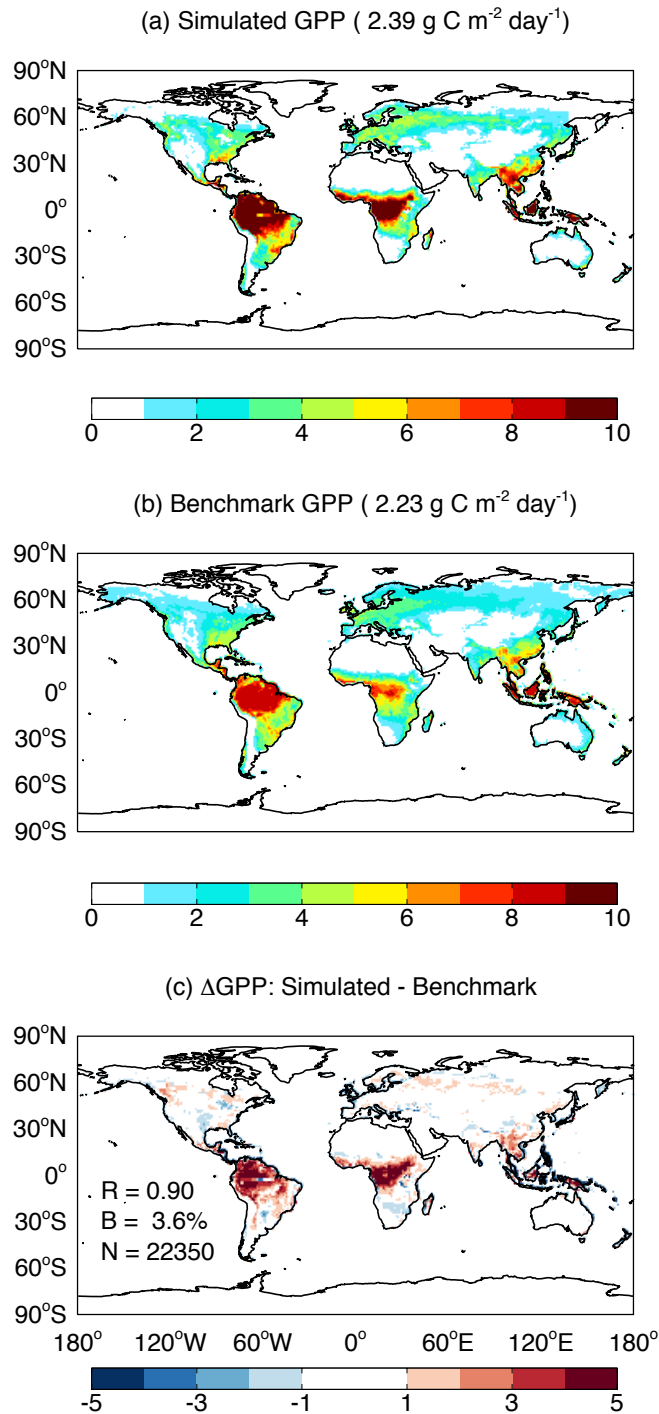

**Supplementary Figure 11 | Evaluation of simulated gross primary productivity (GPP) by YIBs model.** Simulation (a) is performed using the YIBs vegetation model, which is driven with hourly 1°× 1° meteorological forcings for 2001-2011 from the WATCH Forcing Data methodology applied to ERA-Interim reanalysis data (WFDEI)<sup>3</sup>. Global areal weighted GPP are shown on the title brackets. Benchmark product (b) is upscaled from FLUXNET using regression trees<sup>4</sup>. The differences between simulation and benchmark product is shown in (c). The correlation coefficient (R) and relative biases (B) are shown in the bottom figures with indication of total land grid number (N) used for statistics.

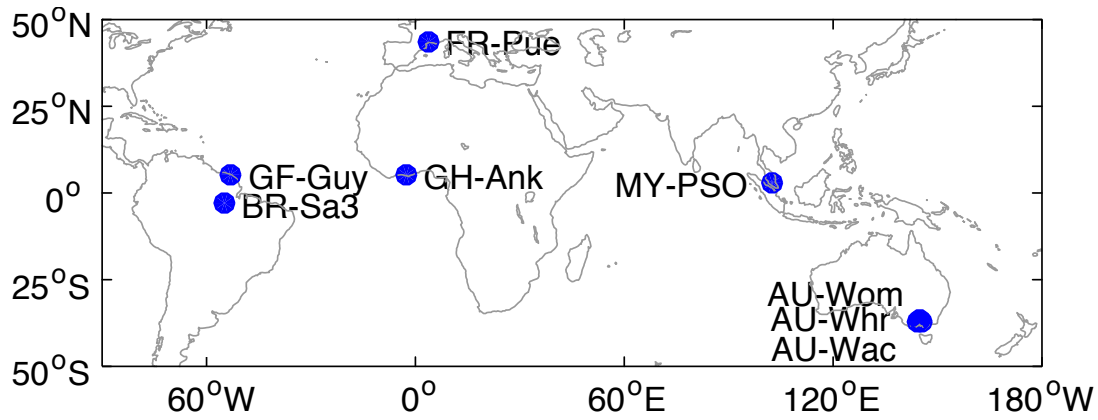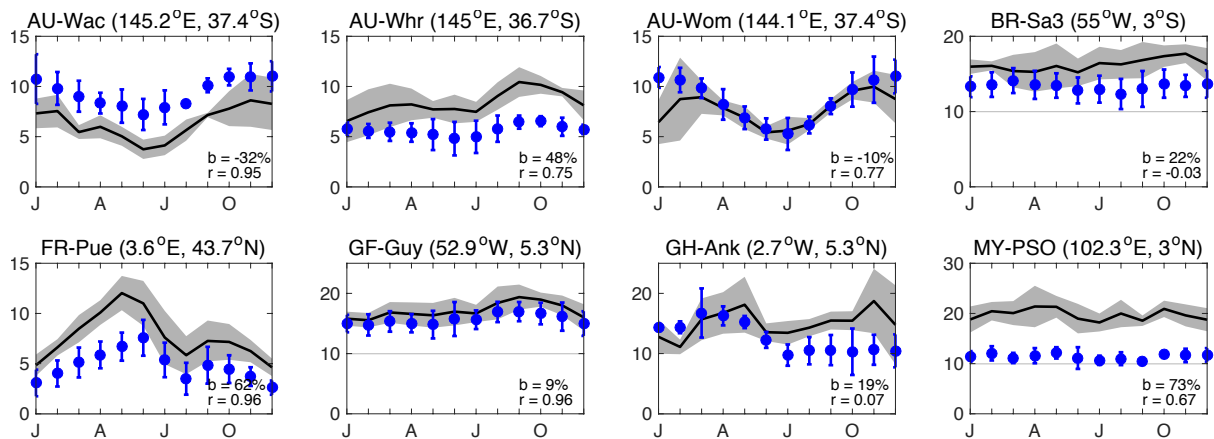

**Supplementary Figure 12 | Evaluation of simulated GPP at evergreen broadleaf forest (EBF) sites.** In the top panel, 8 EBF sites with at least four-year measurements from FLUXNET network (<http://fluxnet.fluxdata.org>) are selected. In the bottom panels, both simulations and observations are averaged for each individual site over the period when measurements are available. Error bars represent one standard deviation of observations while shadings represent that of simulations. The relative bias and correlation coefficient are shown on each panel.

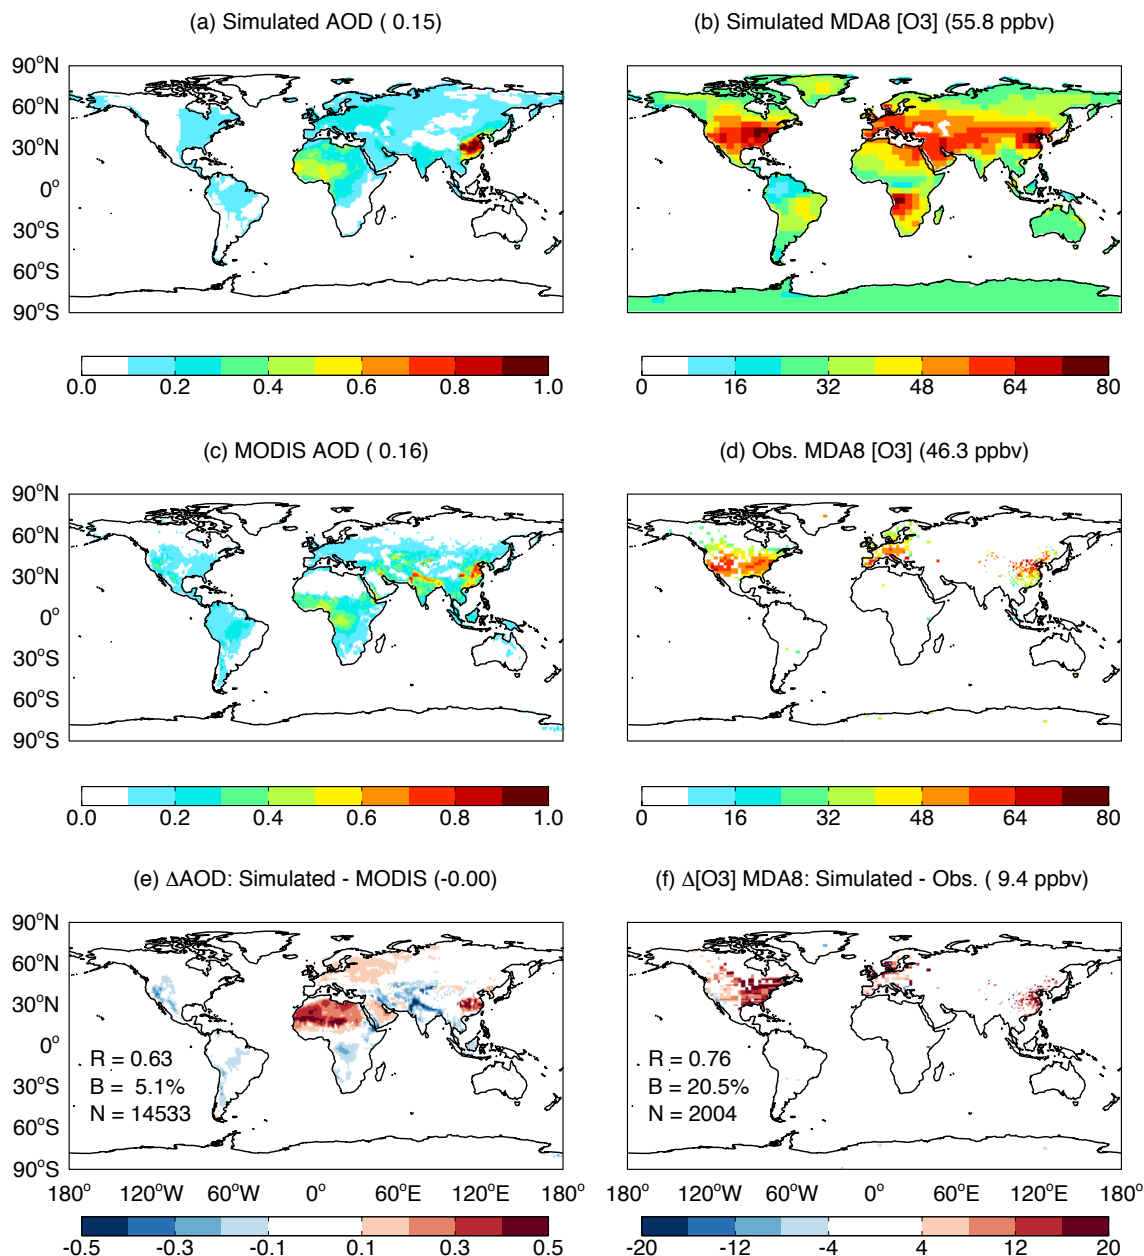

### Supplementary Figure 13 | Evaluation of simulated air pollution by GEOS-Chem model.

Results shown are the (a, c) annual aerosol optical depth (AOD) at 550 nm and (b, d) summertime maximum daily 8-h average (MDA8) O<sub>3</sub> concentrations from (a, b) simulations, (c, d) observations, and (e, f) their differences averaged for period of 2001-2011. Simulations are performed with the GEOS-Chem chemical transport model, which is driven with MERRA meteorology and emissions from anthropogenic, biogenic, and biomass burning sources. Observed AOD is retrieved from the Moderate Resolution Imaging Spectroradiometer (MODIS, <https://modis.gsfc.nasa.gov>). Surface MDA8 O<sub>3</sub> over North America and Europe is adopted from the Global Gridded Surface Ozone Dataset compiled by Sofen, et al.<sup>5</sup> O<sub>3</sub> over China is interpolated from data at ~1500 sites operated by the Ministry of Environmental Protection (<http://english.mep.gov.cn>). Global areal weighted AOD and MDA8 O<sub>3</sub> are shown on the title brackets. The correlation coefficient (R) and relative biases (B) are shown in the bottom figures with indication of grid numbers (N) used for statistics.

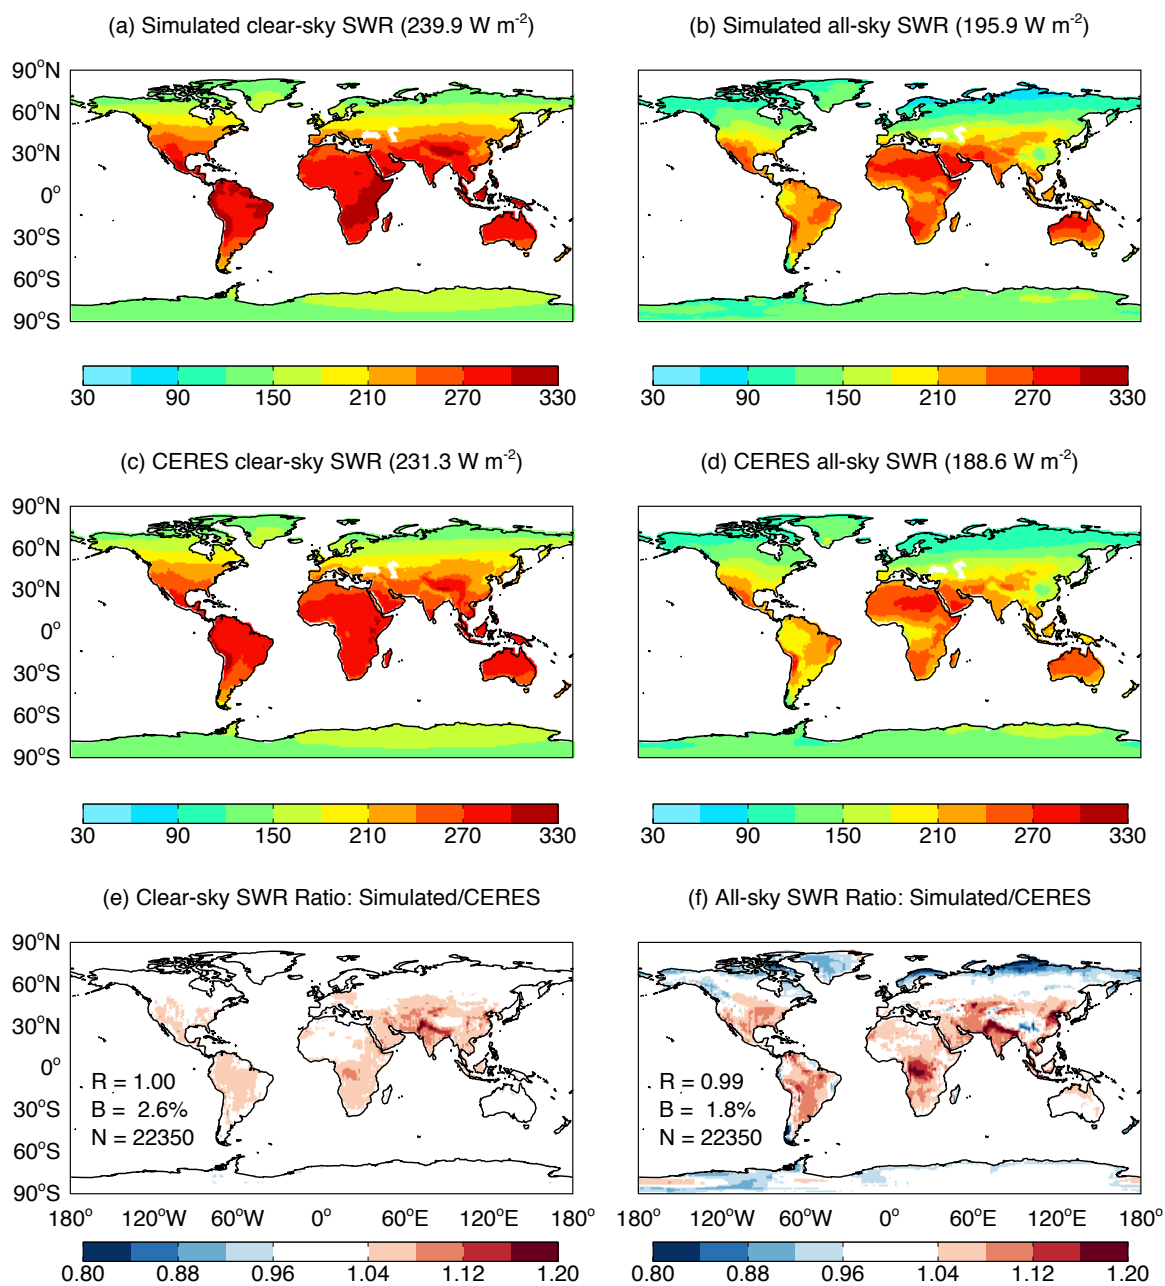

**Supplementary Figure 14 | Evaluation of simulated shortwave radiation by CRM model.**

Results shown are annual mean surface downward shortwave radiation at (a, c) clear-sky and (b, d) all-sky conditions between (a, b) simulations, (c, d) observations, and (e, f) the simulation-to-observation ratio averaged for the period of 2001-2011. Simulations are performed with the Column Radiation Model (CRM), which is driven with hourly  $1^\circ \times 1^\circ$  meteorological forcings from MERRA and cloud profiles from the SYN1deg product of CERES<sup>2</sup>. Observations are adopted from the CERES SYN1deg datasets. Global areal weighted shortwave radiation is shown on the title brackets. The correlation coefficient (R) and relative biases (B) are shown in the bottom figures with indication of total land grid number (N) used for statistics.

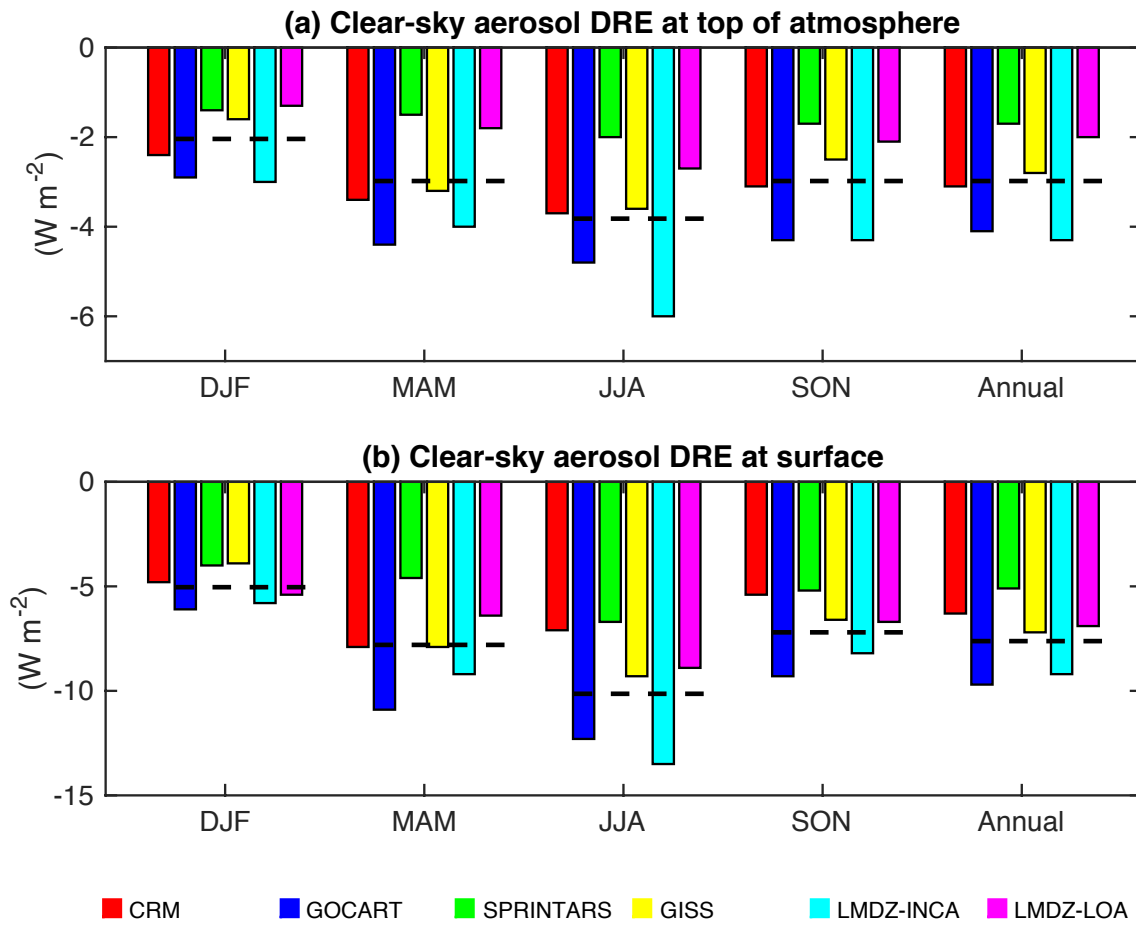

**Supplementary Figure 15 | Comparison of simulated aerosol direct radiative effect (DRE) with other models.** Results shown are aerosol DRE at (a) top of atmosphere and (b) surface between CRM and other models. Comparisons are performed for boreal winter (December-February), spring (March-May), summer (June-August), autumn (September-November), and annual average. Black dashed lines are the averages of estimates from other models. Different colors indicate different models, the details of which have been explained in Yu, et al. <sup>6</sup>.



### Supplementary References

- 1 Sitch, S., Cox, P. M., Collins, W. J. & Huntingford, C. Indirect radiative forcing of climate change through ozone effects on the land-carbon sink. *Nature* **448**, 791-794 (2007).
- 2 Rutan, D. A. et al. CERES Synoptic Product: Methodology and Validation of Surface Radiant Flux. *Journal of Atmospheric and Oceanic Technology* **32**, 1121-1143 (2015).
- 3 Weedon, G. P. et al. The WFDEI meteorological forcing data set: WATCH Forcing Data methodology applied to ERA-Interim reanalysis data. *Water Resources Research* **50**, 7505-7514 (2014).
- 4 Jung, M., Reichstein, M. & Bondeau, A. Towards global empirical upscaling of FLUXNET eddy covariance observations: validation of a model tree ensemble approach using a biosphere model. *Biogeosciences* **6**, 2001-2013 (2009).
- 5 Sofen, E. D. et al. Gridded global surface ozone metrics for atmospheric chemistry model evaluation. *Earth Syst Sci Data* **8**, 41-59 (2016).
- 6 Yu, H. et al. A review of measurement-based assessments of the aerosol direct radiative effect and forcing. *Atmos. Chem. Phys.* **6**, 613-666 (2006).

## References for Supplementary Data 1 <sup>1-62</sup>

- 1 Ainsworth, E. A. Rice production in a changing climate: a meta-analysis of responses to elevated carbon dioxide and elevated ozone concentration. *Global Change Biol* **14**, 1642-1650 (2008).
- 2 Akhtar, N. et al. Effects of ozone on growth, yield and leaf gas exchange rates of two Bangladeshi cultivars of wheat (*Triticum aestivum* L.). *Environ Pollut* **158**, 1763-1767 (2010).
- 3 Barnes, J. D. & Pfirrmann, T. The Influence of CO<sub>2</sub> and O<sub>3</sub>, Singly and in Combination, on Gas-Exchange, Growth and Nutrient Status of Radish (*Raphanus-Sativus* L). *New Phytol* **121**, 403-412 (1992).
- 4 Biswas, D. K. et al. Genotypic differences in leaf biochemical, physiological and growth responses to ozone in 20 winter wheat cultivars released over the past 60 years. *Global Change Biol* **14**, 46-59 (2008).
- 5 Biswas, D. K. et al. Impacts of methods and sites of plant breeding on ozone sensitivity in winter wheat cultivars. *Agr Ecosyst Environ* **134**, 168-177 (2009).
- 6 Calatayud, V. et al. Responses of evergreen and deciduous *Quercus* species to enhanced ozone levels. *Environ Pollut* **159**, 55-63 (2007).
- 7 Cardoso-Vilhena, J., Balaguer, L., Eamus, D., Ollerenshaw, J. & Barnes, J. Mechanisms underlying the amelioration of O<sub>3</sub>-induced damage by elevated atmospheric concentrations of CO<sub>2</sub>. *J Exp Bot* **55**, 771-781 (2004).
- 8 Conran, N. & Paoletti, E. Visible foliar injury and physiological responses to ozone in Italian provenances of *Fraxinus excelsior* and *Fornus*. *The Scientific World Journal* **7**, 90-97 (2007).
- 9 Edwards, G. S., Wullschleger, S. D. & Kelly, J. M. Growth and Physiology of Northern Red Oak - Preliminary Comparisons of Mature Tree and Seedling Responses to Ozone. *Environ Pollut* **83**, 215-221 (1994).
- 10 Farage, P. K. & Long, S. P. The effects of O<sub>3</sub> fumigation during leaf development on photosynthesis of wheat and pea: An in vivo analysis. *Photosynth Res* **59**, 1-7 (1999).
- 11 Fares, S., Oksanen, E., Lannenpaa, M., Julkunen-Tiitto, R. & Loreto, F. Volatile emissions and phenolic compound concentrations along a vertical profile of *Populus nigra* leaves exposed to realistic ozone concentrations. *Photosynth Res* **104**, 61-74 (2010).
- 12 Feng, Z., Zeng, H., Wang, X., Zheng, Q. & Feng, Z. Sensitivity of *Metasequoia glyptostroboides* to ozone stress. *Photosynthetica* **46**, 463-465 (2008).
- 13 Feng, Z. Z., Kobayashi, K. & Ainsworth, E. A. Impact of elevated ozone concentration on growth, physiology, and yield of wheat (*Triticum aestivum* L.): a meta-analysis. *Global Change Biol* **14**, 2696-2708 (2008).
- 14 Feng, Z. Z. et al. Effects of ozone exposure on sub-tropical evergreen *Cinnamomum camphora* seedlings grown in different nitrogen loads. *Trees-Struct Funct* **25**, 617-625 (2011).
- 15 Feng, Z. Z., Pang, J., Kobayashi, K., Zhu, J. G. & Ort, D. R. Differential responses in two varieties of winter wheat to elevated ozone concentration under

- fully open-air field conditions. *Global Change Biol* **17**, 580-591 (2011).
- 16 Fernandezbayon, J. M., Barnes, J. D., Ollerenshaw, J. H. & Davison, A. W. Physiological-Effects of Ozone on Cultivars of Watermelon (*Citrullus-Lanatus*) and Muskmelon (*Cucumis-Melo*) Widely Grown in Spain. *Environ Pollut* **81**, 199-206 (1993).
- 17 Fu, Y. et al. Effects of Elevated Ozone Concentration on Maize Photosynthesis and Grain Quality. *Acta Agriculturae Boreali-Sinica* **23**, 120-124 (2008).
- 18 Grantz, D. A., Vu, H. B., Tew, T. L. & Veremis, J. C. Sensitivity of Gas Exchange Parameters to Ozone in Diverse C-4 Sugarcane Hybrids. *Crop Sci* **52**, 1270-1280 (2012).
- 19 He, X. Y. et al. Changes in effects of ozone exposure on growth, photosynthesis, and respiration of *Ginkgo biloba* in Shenyang urban area. *Photosynthetica* **45** (2007).
- 20 Kellomaki, S. & Wang, K. Y. Effects of elevated O<sub>3</sub> and CO<sub>2</sub> concentrations on photosynthesis and stomatal conductance in Scots pine. *Plant Cell Environ* **20**, 995-1006 (1997).
- 21 Kitao, M., Komatsu, M., Yazaki, K., Kitaoka, S. & Tobita, H. Growth overcompensation against O<sub>3</sub> exposure in two Japanese oak species, *Quercus mongolica* var. *crispula* and *Quercus serrata*, grown under elevated CO<sub>2</sub>. *Environ Pollut* **206**, 133-141 (2015).
- 22 Kleier, C., Farnsworth, B. & Winner, W. Biomass, reproductive output, and physiological responses of rapid-cycling Brassica (*Brassica rapa*) to ozone and modified root temperature. *New Phytol* **139**, 657-664 (1998).
- 23 Kouterick, K. et al. Foliar injury, leaf gas exchange and biomass responses of black cherry (*Prunus serotina* ehrh.) half-sibling families to ozone exposure. *Environ Pollut* **107**, 117-126 (2000).
- 24 Kronfuss, G., Polle, A., Tausz, M., Havranek, W. M. & Wieser, G. Effects of ozone and mild drought stress on gas exchange, antioxidants and chloroplast pigments in current-year needles of young Norway spruce [*Picea abies* (L.) Karst.]. *Trees-Struct Funct* **12**, 482-489 (1998).
- 25 Kull, O. et al. Photosynthetic responses of aspen clones to simultaneous exposures of ozone and CO<sub>2</sub>. *Canadian Journal of Forest Research* **26**, 639-648 (1996).
- 26 Matyssek, R., Gunthardtgoerg, M. S., Keller, T. & Scheidegger, C. Impairment of Gas-Exchange and Structure in Birch Leaves (*Betula-Pendula*) Caused by Low Ozone Concentrations. *Trees-Struct Funct* **5**, 5-13 (1991).
- 27 Miller, J. E. et al. Ultraviolet-B Radiation and Ozone Effects on Growth, Yield, and Photosynthesis of Soybean. *J Environ Qual* **23**, 83-91 (1994).
- 28 Mulchi, C. L. et al. Growth and Physiological-Characteristics of Soybean in Open-Top Chambers in Response to Ozone and Increased Atmospheric CO<sub>2</sub>. *Agr Ecosyst Environ* **38**, 107-118 (1992).
- 29 Noble, R., Jensen, K. F., Ruff, B. S. & Loats, K. Response of *Acer-Saccharum* Seedlings to Elevated Carbon-Dioxide and Ozone. *Ohio J Sci* **92**, 60-62 (1992).
- 30 Oguntimehin, I., Eissa, F. & Sakugawa, H. Simultaneous ozone fumigation and

- fluoranthene sprayed as mists negatively affected cherry tomato (*Lycopersicon esculentum* Mill). *Ecotox Environ Safe* **73**, 1028-1033 (2010).
- 31 Pang, J., Kobayashi, K. & Zhu, J. G. Yield and photosynthetic characteristics of flag leaves in Chinese rice (*Oryza sativa* L.) varieties subjected to free-air release of ozone. *Agr Ecosyst Environ* **132**, 203-211 (2009).
- 32 Paoletti, E., Nali, C. & Lorenzini, G. Early responses to acute ozone exposure in two *Fagus sylvatica* clones differing in xeromorphic adaptations: Photosynthetic and stomatal processes, membrane and epicuticular characteristics. *Environ Monit Assess* **128**, 93-108 (2007).
- 33 Pellegrini, E., Francini, A., Lorenzini, G. & Nali, C. PSII photochemistry and carboxylation efficiency in *Liriodendron tulipifera* under ozone exposure. *Environ Exp Bot* **70**, 217-226 (2011).
- 34 Power, S. A. & Ashmore, M. R. Responses of fen and fen-meadow communities to ozone. *New Phytol* **156**, 399-408 (2002).
- 35 Reiling, K. & Davison, A. W. Effects of Ozone on Stomatal Conductance and Photosynthesis in Populations of *Plantago-Major* L. *New Phytol* **129**, 587-594 (1995).
- 36 Retzlaff, W. A., Williams, L. E. & Dejong, T. M. The Effect of Different Atmospheric Ozone Partial Pressures on Photosynthesis and Growth of 9 Fruit and Nut Tree Species. *Tree Physiol* **8**, 93-105 (1991).
- 37 Robinson, J. M. & Britz, S. J. Tolerance of a field grown soybean cultivar to elevated ozone level is concurrent with higher leaflet ascorbic acid level, higher ascorbate-dehydroascorbate redox status, and long term photosynthetic productivity. *Photosynth Res* **64**, 77-87 (2000).
- 38 Singh, E., Tiwari, S. & Agrawal, M. Effects of elevated ozone on photosynthesis and stomatal conductance of two soybean varieties: a case study to assess impacts of one component of predicted global climate change. *Plant Biology* **11**, 101-108 (2009).
- 39 Soldatini, G. F., Nali, C., Guidi, L. & Lorenzini, G. Photosynthesis of *Hedera canariensis* var. *azorica* variegated leaves as affected by ozone. *Photosynthetica* **35**, 247-253 (1998).
- 40 Taylor, M. D., Sinn, J. P., Davis, D. D. & Pell, E. J. The impact of ozone on a salt marsh cordgrass (*Spartina alterniflora*). *Environ Pollut* **120**, 701-705 (2002).
- 41 Tjoelker, M., Volin, J., Oleksyn, J. & Reich, P. Interaction of ozone pollution and light effects on photosynthesis in a forest canopy experiment. *Plant Cell Environ* **18**, 895-905 (1995).
- 42 Tjoelker, M. G. & Luxmoore, R. J. Soil-Nitrogen and Chronic Ozone Stress Influence Physiology, Growth and Nutrient Status of *Pinus-Taeda-L* and *Liriodendron-Tulipifera-L* Seedlings. *New Phytol* **119**, 69-81 (1991).
- 43 Tjoelker, M. G., Volin, J. C., Oleksyn, J. & Reich, P. B. Light Environment Alters Response to Ozone Stress in Seedlings of *Acer-Saccharum* Marsh and Hybrid *Populus L.* 1. In-Situ Net Photosynthesis, Dark Respiration and Growth. *New Phytol* **124**, 627-636 (1993).
- 44 Torsethaugen, G., Pitcher, L. H., Zilinskas, B. A. & Pell, E. J. Overproduction

- of ascorbate peroxidase in the tobacco chloroplast does not provide protection against ozone. *Plant Physiol* **114**, 529-537 (1997).
- 45 Volin, J. C., Reich, P. B. & Givnish, T. J. Elevated carbon dioxide ameliorates the effects of ozone on photosynthesis and growth: species respond similarly regardless of photosynthetic pathway or plant functional group. *New Phytol* **138**, 315-325 (1998).
- 46 von Tiedemann, A. & Firsching, K. H. Interactive effects of elevated ozone and carbon dioxide on growth and yield of leaf rust-infected versus non-infected wheat. *Environ Pollut* **108**, 357-363 (2000).
- 47 Wahid, A. Productivity losses in barley attributable to ambient atmospheric pollutants in Pakistan. *Atmos Environ* **40**, 5342-5354 (2006).
- 48 Wahid, A., Ahmad, S. S., Butt, Z. A. & Ahmad, M. Exploring the Hidden Threat of Gaseous Pollutants Using Rice (*Oryza Sativa* L.) Plants in Pakistan. *Pak J Bot* **43**, 365-382 (2011).
- 49 Watanabe, M., Umemoto-Yamaguchi, M., Koike, T. & Izuta, T. Growth and photosynthetic response of *Fagus crenata* seedlings to ozone and/or elevated carbon dioxide. *Landsc Ecol Eng* **6**, 181-190 (2010).
- 50 Wei, C. et al. Influence of light fleck and low light on foliar injury and physiological responses of two hybrid poplar clones to ozone. *Environ Pollut* **130**, 215-227 (2004).
- 51 Welfare, K., Flowers, T. J., Taylor, G. & Yeo, A. R. Additive and antagonistic effects of ozone and salinity on the growth, ion contents and gas exchange of five varieties of rice (*Oryza sativa* L.). *Environ Pollut* **92**, 257-266 (1996).
- 52 Wiese, C. B. & Pell, E. J. Influence of ozone on transgenic tobacco plants expressing reduced quantities of Rubisco. *Plant Cell Environ* **20**, 1283-1291 (1997).
- 53 Wittig, V. E., Ainsworth, E. A. & Long, S. P. To what extent do current and projected increases in surface ozone affect photosynthesis and stomatal conductance of trees? A meta-analytic review of the last 3 decades of experiments. *Plant Cell Environ* **30**, 1150-1162 (2007).
- 54 Xu, S. et al. Differential sensitivity of four urban tree species to elevated O<sub>3</sub>. *Urban Forestry & Urban Greening* **14**, 1166-1173 (2015).
- 55 Yan, K. et al. Responses of photosynthesis, lipid peroxidation and antioxidant system in leaves of *Quercus mongolica* to elevated O<sub>3</sub>. *Environ Exp Bot* **69**, 198-204 (2010).
- 56 Yonekura, T., Dokiya, Y., Fukami, M. & Izuta, T. Effects of ozone and/or soil water stress on growth and photosynthesis of *Fagus crenata* seedlings. *Water Air Soil Poll* **130**, 965-970 (2001).
- 57 Yuan, X. Y. et al. Assessing the effects of ambient ozone in China on snap bean genotypes by using ethylenediurea (EDU). *Environ Pollut* **205**, 199-208 (2015).
- 58 Zeuthen, J., Mikkelsen, T., Paludan-Muller, G. & Ro-Poulsen, H. Effects of increased UV-B radiation and elevated levels of tropospheric ozone on physiological processes in European beech (*Fagus sylvatica*). *Physiol Plantarum* **100** (1997).

- 59 Zhang, W. et al. Effects of ozone exposure on growth and photosynthesis of the seedlings of *Liriodendron chinense* (Hemsl.) Sarg, a native tree species of subtropical China. *Photosynthetica* **49**, 29-36 (2011).
- 60 Zhang, W. W., Feng, Z. Z., Wang, X. K. & Niu, J. F. Responses of native broadleaved woody species to elevated ozone in subtropical China. *Environ Pollut* **163**, 149-157 (2012).
- 61 Zheng, Y., Zhang, J., Wu, R., Zhao, Z. & Hu, C. Effects of ozone stress on photosynthesis and physiological characteristics of winter wheat in northern China. *Journal of Agro-Environment Science* **29**, 1429-1436 (2010).
- 62 Zouzoulas, D., Koutroubas, S. D., Vassiliou, G. & Vardavakis, E. Effects of ozone fumigation on cotton (*Gossypium hirsutum* L.) morphology, anatomy, physiology, yield and qualitative characteristics of fibers. *Environ Exp Bot* **67**, 293-303 (2009).
