# Supplementary material for: Fire air pollution reduces global terrestrial productivity
Source: PubMed Central journal article supplement (PMC6303378; doi:10.1038/s41467-018-07921-4), 2018-12-21
Supplement: 41467_2018_7921_MOESM3_ESM.pdf [file 41467_2018_7921_MOESM3_ESM.pdf]

## **Description of Additional Supplementary Files**

**File Name:** Supplementary Data 1

**Description:** Summary of measurement data for O<sub>3</sub> effects on plant photosynthesis from literatures
